# Supplementary material for: Genome-Wide Analysis of Serine Carboxypeptidase-Like Acyltransferase Gene Family for Evolution and Characterization of Enzymes Involved in the Biosynthesis of Galloylated Catechins in the Tea Plant (Camellia sinensis)
Source: Front Plant Sci. 2020 Jun 25;11:848. doi: 10.3389/fpls.2020.00848 (PMC7330524; doi:10.3389/fpls.2020.00848)
Supplement: DATASET S1 — Physical parameters of tea proteins coded by CsSCPL genes. [file Data_Sheet_1.xls]

## Sheet: Dataset S1
Physical parameters of tea proteins coded by CsSCPL genes
Name	Sequence ID	Type	Location	Scaffold	Clad	MW (kDa)	pI	Protein size (A.A)	Exons	ORF length (bp)	Predicted cell loccalization
CsSCPL1-IA	TEA020540	I	825185-831855	681	IA	57.91	5.15	509	11	1530	Lysosomal
CsSCPL2-IA	TEA009664	I	1837360-1842095	194	IA	54.54	5.58	476	11	1431	Plasma Membrane
CsSCPL3-IA	TEA000223	I	62266-68359	3023	IA	35.28	6.83	315	8	948	Plasma Membrane
CsSCPL4-IA	TEA010715	I	689447:697177	2639	IA	43.28	4.67	381	11	1146	Lysosomal
CsSCPL6-IA	TEA034050	I	3231257-3234329	1989	IA	44.71	5.82	389	7	1170	Plasma Membrane
CsSCPL5-IA	TEA034028	I	03--3816	36410	IA	55.28	5.16	484	11	1455	Extracellular
CsSCPL7-IA	TEA023432	I	475282-479315	2990	IA	49.46	5.07	439	12	1320	Plasma Membrane
CsSCPL8-IA	TEA034026	I	550806-562194	2990	IA	60.66	7.14	518	9	1557	Plasma Membrane
CsSCPL9-IA	TEA034036	I	889979-898634	2990	IA	61.32	6.71	537	13	1614	Plasma Membrane
CsSCPL10-IA	TEA034039	I	583875-599417	2990	IA	43.66	6.46	381	9	1146	Plasma Membrane
CsSCPL12-IA	TEA023444	I	813414-817253	2990	IA	63.26	6.78	549	11	1650	Plasma Membrane
CsSCPL11-IA	TEA023451	I	572053-580825	2990	IA	51.18	5.3	450	13	1353	Lysosomal
CsSCPL15-IA	TEA034034	I	901904-918577	2990	IA	55.92	7.13	585	10	1758	Plasma Membrane
CsSCPL13-IA	TEA034055	I	414423-429682	5112	IA	56.12	5.27	498	14	1497	Lysosomal
CsSCPL14-IA	TEA027270	I	1341505-1348626	1289	IA	46.22	6.16	413	10	1242	Extracellular
CsSCPL16-IA	TEA016469	I	440614-453668	3528	IA	39.64	4.67	350	8	1053	Extracellular
CsSCPL17-IA	TEA016463	I	483726-491104	3528	IA	65.42	4.91	575	9	1728	Plasma Membrane
CsSCPL18-IA	TEA034030	I	182056-187289	3790	IA	27.49	6.55	238	6	717	Nuclear
CsSCPL19-IA	TEA034049	I	184427-187301	3790	IA	40.26	4.86	352	8	1059	Extracellular
CsSCPL20-IA	TEA034017	I	394036-400974	5112	IA	41.58	5.34	366	6	1101	Plasma Membrane
CsSCPL21-IA	TEA034033	I	921880-933719	2990	IA	58.78	7.16	515	12	1548	Plasma Membrane
CsSCPL22-IA	TEA034031	I	357600-371641	5480	IA	58.32	7.8	508	11	1527	Plasma Membrane
CsSCPL23-IA	TEA034032	I	375639-383243	5480	IA	56.92	5.71	500	14	1503	Lysosomal
CsSCPL24-IA	TEA034056	I	721935-745702	2639	IA	73.8	5.31	651	9	1956	Plasma Membrane
CsSCPL25-IA	TEA034027	I	486996-523992	2990	IA	40.3	9.97	347	10	1044	Plasma Membrane
CsSCPL26-IA	TEA034037	I	867470-880339	2990	IA	53.37	8.9	463	9	1392	Plasma Membrane
CsSCPL27-IA	TEA034038	I	824498-837315	2990	IA	56.69	9.22	490	10	1473	Plasma Membrane
CsSCPL28-IB	TEA002670	I	1311418:1315963	2552	IB	55.64	5.23	496	9	1491	Lysosomal
CsSCPL1-II	TEA000768	II			II	54.35	6.49	488		1467	Extracellular/Lysosomal
CsSCPL2-II	TEA000773	II				52.07	6.56	466		1401	Lysosomal
CsSCPL3-II	TEA001323	II				49.79	6.73	442		1329	Lysosomal
CsSCPL4-II	TEA002755	II				48.54	5.45	434		1305	Plasma Membrane
CsSCPL5-II	TEA003786	II				54.34	8.1	480		1443	Lysosomal
CsSCPL6-II	TEA003790	II				51.59	6.24	455		1368	Lysosomal
CsSCPL7-II	TEA003791	II				50.03	8.27	446		1341	Lysosomal
CsSCPL8-II	TEA005705	II				48.72	5.84	433		1302	Plasma Membrane
CsSCPL9-II	TEA007918	II				48.62	6.02	438		1317	Lysosomal
CsSCPL10-II	TEA009646	II				51.73	5.64	454		1365	Extracellular
CsSCPL11-II	TEA011457	II				49.23	4.67	437		1314	Lysosomal/Extracellular
CsSCPL12-II	TEA013334	II				41.08	5.44	363		1092	Extracellular/Lysosomal
CsSCPL13-II	TEA014649	II				49.55	7.37	435		1308	Lysosomal/Extracellular
CsSCPL14-II	TEA018021	II				51.22	5.83	456		1371	Plasma Membrane
CsSCPL15-II	TEA019947	II				54.8	6.29	481		1446	Lysosomal/Extracellular
CsSCPL16-II	TEA024180	II				48.06	4.71	435		1308	Plasma Membrane/Extracellular/Lysosomal
CsSCPL17-II	TEA029303	II				57.33	5.73	508		1527	Extracellular
CsSCPL1-III	TEA015220	III			III	50.55	7.21	456		1371	Outer membrane/Periplasmic
CsSCPL2-III	TEA021977	III				57.54	5	517		1554	Extracellular

## Sheet: Dataset S2
Cis-acting analysis of CsSCPL gene promoter regions
Gene number		1	2	3	4	5	6	7	8	9	10	11	12	13	14	15	16	17	18	19	20	21	22	23	24	25	26	27	28	29	30	31	32	33	34	35	36	37	1	2	3	4	5	6	7	8	9	10	11
		AAAC-motif	3-AF1 binding site	3-AF3 binding site	AT1-motif	4cl-CMA2b	ATCT-motif	ACE	AE-box	Box 4	Box I	box II	CATT-motif	CATG-motif	CG-motif	chs-CMA1a	chs-CMA2a	GAG-motif	GA-motif	MNF1	Gap-box	GATA-motif	GATT-motif	G-Box	G-box	GC-motif	GT1-motif	LS7	I-box	LAMP-element	L-box	MRE	rbcS-CMA7a	Sp1	TCCC-motif	TCT-motif	TGG-motif	as-2-box	ABRE	CE 3	ERE	TGACG-motif	AuxRR-core	GARE-motif	P-box	TATC-box	TCA-element	TGA-box	TGA-element
		light responsive element	light responsive element	Part of a conserved DNA module array (CMA3)	part of a light responsive module	light responsive element	cis-acting regulatory element associated to the TGAGTCA motif	cis-acting element involved in light responsiveness	part of a module for light response	part of a conserved DNA module involved in light responsiveness	light responsive element	part of a light responsive element	part of a light responsive element	part of a light responsive element	part of a light responsive element	part of a light responsive element	part of a light responsive element	part of a light responsive element	part of a light responsive element	light responsive element	part of a light responsive element	part of a light responsive element	part of a light responsive element	cis-acting regulatory element involved in light responsiveness	cis-acting regulatory element involved in light responsiveness	part of a light responsive element	light responsive element	part of a light responsive element	part of a light responsive element	part of a light responsive element	part of a light responsive element	MYB binding site involved in light responsiveness	part of a light responsive element	light responsive element	part of a light responsive element	part of a light responsive element	part of a light responsive element	light-responsive promoters and implicated in shoot-specific expression	cis-acting element involved in the abscisic acid responsiveness	cis-acting element involved in ABA and VP1 responsiveness	ethylene-responsive element	cis-acting regulatory element involved in the MeJA-responsiveness	cis-acting regulatory element involved in auxin responsiveness	gibberellin-responsive element	gibberellin-responsive element	cis-acting element involved in gibberellin-responsiveness	cis-acting element involved in salicylic acid responsiveness	part of an auxin-responsive element	auxin-responsive element
Catergory		Light responsive elements																																					Hormone responsive elements
1	TEA000223	1						1				1	1							1	1	2		2	6				1					2		1			3			1	1				1
2	TEA009664			1			1	1		1	1	1								1		1		1	3				2					2		2			1				1			1	1
3	TEA010715							1		1	1					1								1	2							1				2			1					1			1
4	TEA016463			1				1			3	1								1				2	5									1		1			1				1			1			1
5	TEA016469	1																1				2		2	5				2					2		1			2										1
6	TEA020540									3	3					1						1		1			1			1		1				2								1	1				1
7	TEA023432							1	1		9	1						1				1		1	4		1		3				1	6		1			1		5	1	1	1			2		3
8	TEA023444							2	2		9	2						1				1		2	8				3							3			2		5	1	2			2		3
9	TEA023451		1				2	1		2	4					1			1								1		1					1				1			1	2		2	1	2	1		1
10	TEA027270						1	1		3	1							2	1			1		1		1	3				1			1					1					1
11	TEA034017									3	3					1											1			1		1				2								1				1
12	TEA034026						1	1		3						1		3				1					1		1					1	1	1								2	1
13	TEA034027		1						1	6	2								1			3	1						2												1	1					3
14	TEA034030												1		1		1	3						2	4	3								9		1			1					2	1		1
15	TEA034031			1						2	3																1		1			1		1		2					1	1					1
16	TEA034032									3	1							1	1								1	1	1							2						2		2			1
17	TEA034033						1	1		1	1							1						1	2		1		1							1					1	1	1
18	TEA034034				1			1		1	1							1	1						1		1		1								1				1	1	1
19	TEA034036		1				2	1		1	4											1					1		1					4							1	2		2		3	1		1
20	TEA034037						1			3								2	1			1		1	1									2		1								2	1		2
21	TEA034038				1					6								1	1		1				2		1															1		1			4
22	TEA034039				1			1		2	2							1	1					1	2		1		1										1		1		1
23	TEA034049												1		1			3						2	4	3								9		1			1					2	1		1
24	TEA034050				1	1	1	1	1	1	2											1					3		1		1			1							2			1		1	1
25	TEA034055							2	2											1	1	1		1	1	1	2		1		1								1			2		1			1		1
26	TEA034056		1					1			2					1			1		1	1					1									1		1		1		1			1				1
																																											Abscisic acid responsive elements	17
																																											Ethylene responsive element	19
																																											MeJA responsive elements	34
																								Light responsive Elements	423																		Auxin responsive elements	23
																								Hormone Responsive element	154																		Gibberellin responsive element	39
																								Environmental stress responsive element	257																		Salicylic acid responsive	22
																								Plant growth related elements	215
[truncated: 51 more columns]

## Sheet: Dataset S3
Tissue-specific expression of CsSCPL genes in tea.										Cold stress							NaCl stress					Al-H+ stress								Shading treatment															MeJA treatment
	Apical bud	Flower	Fruit	Young leaf	Mature leaf	Old leaf	Root	Stem		Gene ID	CA1-6h	CA1-7d	CA2-7d	CK	DA-7d		N-0h	NaCl-N-24h	NaCl-N-48h	NaCl-N-72h		Control (0 h)	Control (12 h)	Control (24 h)	Control (48 h)	Al (12 h)	Al (24 h)	Al (48 h)		Light 0 h	Light 4 h	Light 8 h	Light 2D	Light 4D	Light 8D	Light 14D	Shedding 0 h	Shedding 4 h	Shedding 8 h	Shedding 2D	Shedding 4D	Shedding 8D	Shedding 14D		Control	12h_MeJA	24h_MeJA	48h_MeJA
TEA020540_CsSCPL1-IA	4.25	0.18	0.87	3	0.89	1	0.91	1.49		TEA020540_CsSCPL1-IA	0.0652783	0.0304027	0	0.0326706	0.0615025		0	0	0	0		0.38	0.3	0.14	0.04	0	0.14	0.14		9.04	8.94	9.02	5.96	12.55	13.67	11.71	8.84	9.15	8.68	10.59	11.93	14.3	7.43		0.508879	0.473424	0.721838	0.284035
TEA009664_CsSCPL2-IA	666.56	2.64	0.17	410.74	1.02	0.61	0.35	31.94		TEA009664_CsSCPL2-IA	0	0	0	0	2.67525		0.15868	0	0	0		0	0.25	0	0.13	0.15	0.07	0		91.38	87.87	55.13	61.25	78.48	142.11	116.7	105.47	90.05	88.28	128.84	106.78	150.44	102.03		2.72914	5.12368	8.46113	6.71617
TEA000223_CsSCPL3-IA	194.96	1.08	NA	106.08	NA	0.06	0.04	8.19		TEA000223_CsSCPL3-IA	0	0.222151	0.0620654	0.304093	5.64032		1.61638	0.189303	0.215908	0		0.34	0	0	0	0	0.61	0		57.26	52.42	36.28	35.6	52	85.26	77.91	67.92	57.03	47.26	66.19	60.45	114.75	63.68		45.183	85.9663	119.923	41.4379
TEA010715_CsSCPL4-IA	68.75	1.09	4.92	30.48	9.35	2.98	3.42	15.46		TEA010715_CsSCPL4-IA	2.84598	1.95355	0.640002	4.03387	3.4616		0.593137	0.819697	0.339676	0.804515		2.63	0.7	3.76	2.52	0.77	2.06	1.37		21.58	19.05	22.28	16.13	28	33.6	29.35	27.67	26.3	29.45	30.83	32.82	36.58	24.61		5.65761	2.00914	2.58014	3.51352
TEA034028_CsSCPL5-IA	39.55	1.33	4.65	22.27	7.6	6.09	2.04	7.41		TEA034050_CsSCPL6-IA	0	0	0	0	0		0.240204	0.070432	0.0802489	0		0.16	1.03	1.79	0.16	0.44	0.71	0.91		23.95	21.83	19.35	17.94	30.71	34.04	24.93	26	29.59	33.22	32.49	36.78	35.01	19.26		1.5827	0.373597	0.45524	1.44189
TEA034050_CsSCPL6-IA	2.13	0.03	0.22	1.95	0.23	0.6	0.1	0.72		TEA034028_CsSCPL5-IA	1.10755	1.20413	1.76085	0.848236	1.63487		1.65681	0.770868	1.56244	0.659916		0.67	0.38	1.76	0.87	0.49	1.16	0.51		5.59	5.18	4.96	3.38	6.24	7.7	4.64	5.63	5.67	5.6	7	7.15	6.86	4.76		10.4909	3.0212	3.66782	6.86279
TEA023432_CsSCPL7-IA	248.68	365.07	0.71	127.1	0.99	0.33	6.64	36.01		TEA023432_CsSCPL7-IA	0	0.183615	0.0849675	0	2.16282		0.927403	0.0627821	0.0715098	0		4.5	4.45	3.36	1.49	3.2	5.26	1.95		162.58	148.44	87.05	89.79	142.37	241.46	211.32	183.22	165.24	137.53	185.53	219.04	273.87	159.44		19.9981	15.4897	30.9432	18.4517
TEA034026_CsSCPL8-IA	0.05	NA	NA	0.03	NA	NA	NA	NA		TEA034026_CsSCPL8-IA	0	0	0	0	0		0	0	0	0		0	0	0	0	0	0	0		0	0	0	0	0	0	0	0	0	0	0	0	0.05	0		0.18243	0	0.0524502	0
TEA034036_CsSCPL9-IA	35.68	5.01	0.31	20.07	1.04	0.19	0.41	8.33		TEA034036_CsSCPL9-IA	0.0299822	0.113471	0.161045	0.094638	1.8967		1.29213	0.296884	0.112656	0		4.29	3.99	4.43	3.11	2.23	5.07	3.36		50.35	107.33	97.31	107.24	131.99	167.84	154.11	56	105.87	125.13	146.09	150.56	165.63	132.26		27.6031	4.38663	5.53502	26.8844
TEA034039_CsSCPL10-IA	0.28	NA	0.15	0.11	0.32	0.04	NA	0.15		TEA034039_CsSCPL10-IA	0.0450218	0.0434028	0	0.048887	0		0.0831193	0	0	0		0	0	0	0	0	0	0		0	0	0.22	0.07	0.07	0	0	0	0.14	0	0	0	0	0		0.110655	0.0703531	0.107789	0.206781
TEA023451_CsSCPL11-IA	553.72	21.44	2.3	402.66	10.94	2.63	6	77.15		TEA023444_CsSCPL12-IA	0	0	0	0	0.0557784		0	0	0	0		1.77	2.35	2.94	0.71	2.47	4.92	1.12		134.22	116.49	62.15	67.18	104.87	184.11	159.43	137.87	134.31	108.31	144.03	175.77	218.7	134.63		2.46805	0.483701	2.06772	1.88095
TEA023444_CsSCPL12-IA	351.8	743.36	0.89	180.2	0.94	0.65	8.87	44.7		TEA023451_CsSCPL11-IA	0.545108	0.385595	0.357372	0.361073	3.56213		1.38892	0.611224	0.139229	0		1.19	1.17	0.74	0.56	1.14	1.19	1.25		48.09	115.08	94.6	109.14	143.14	178.3	136.18	49.19	112.04	130.61	144.58	158.34	162.63	129.21		36.626	4.28915	6.13611	47.8544
TEA034055_CsSCPL13-IA	29.42	36.89	78.15	29.11	86.41	55.79	55.25	55.99		TEA034034_CsSCPL15-IA	0	0	0	0	0		0	0	0	0		0	0	0	0	0	0	0		0	0.15	0.11	0	0.07	0.07	0.13	0	0.05	0	0.1	0	0.39	0.11		0	0.0201435	0.0685235	0.0778476
TEA027270_CsSCPL14-IA	3.06	3.84	7.27	2.78	5.4	4.54	5.17	3.7		TEA034055_CsSCPL13-IA	34.0255	30.5563	30.0374	34.3165	19.862		14.4485	11.2541	15.1044	30.7403		41.23	36.12	34.59	34.45	39.02	36.1	34.83		13.21	11.7	10.02	9.12	11.25	10.71	18.13	14.1	10.39	10.19	11.08	13.18	12.06	17.19		7.52918	15.1632	16.5278	12.0391
TEA034034_CsSCPL15-IA	0.38	0.23	0.52	0.3	0.1	NA	0.12	0.06		TEA027270_CsSCPL14-IA	1.01371	1.05339	1.36437	0.763999	6.14684		3.74046	3.60196	6.33654	10.2622		9.67	8.03	9.59	9.78	9.41	10.77	7.43		2.5	4.26	4.17	3.16	4.76	2.84	3.97	3.4	3.41	2.98	2.51	3.37	2.66	2.73		1.58046	3.87071	4.78419	2.02851
TEA016469_CsSCPL16-IA	81.23	1.1	0.6	61.07	0.79	1.09	0.45	5.27		TEA016469_CsSCPL16-IA	0	0	0	0	0		0	0	0	0		0.17	0.17	0.47	0	0.06	0.24	0.25		52.31	51.75	33.53	37.25	47.8	81.28	70.9	58.79	58.28	47.66	73.76	67.02	94.4	59.12		0.201359	1.00459	1.60761	0.397901
TEA016463_CsSCPL17-IA	2.03	0.02	0.13	1.72	0.12	NA	NA	0.28		TEA016463_CsSCPL17-IA	0	0	0	0	0		0.0517374	0	0	0		0.64	0.4	0.29	0.04	0.46	0.33	0.12		105.51	104.53	68.06	71.36	95.28	168.6	130.13	131.41	109.38	106.71	151.89	129.47	177.62	126.84		1.39439	2.63999	3.62245	1.83003
TEA034030_CsSCPL18-IA	0.07	0.06	NA	NA	NA	NA	0.13	NA		TEA034030_CsSCPL18-IA	0.458236	0.169219	0.0982035	0.851608	0.339022		0.473295	0	0	0		0	0	0	0	0	0	0		0	0	0.64	0	0	0.22	0.42	0.12	0	0.54	0	0	0	0		4.39537	0.538436	0.674065	2.63615
TEA034049_CsSCPL19-IA	0.75	0.06	0.44	0.45	0.63	0.19	0.43	0.37		TEA034049_CsSCPL19-IA	0	0	0	0	0		0	0	0	0		2.17	2.33	1.28	1.23	1.48	2.01	2.09		10.56	9.41	7.3	8.46	11.38	14.01	10.45	8.49	9.97	9.99	12.99	13.81	12.19	11.05		0.709175	0.0484709	0	0.396481
TEA034017_CsSCPL20-IA	1.03	NA	0.15	0.58	0.38	0.05	0.07	0.25		TEA034017_CsSCPL20-IA	0	0	0	0	0		0.175138	0.0769996	0	0		0.51	0.41	0.64	0.29	0.12	0.18	0.29		18.25	19.87	14.28	12.13	22.37	25.76	24.2	18.95	18.77	22.61	21.39	24.18	31.97	16.45		4.41466	0.74118	1.06495	1.41013
TEA034033_CsSCPL21-IA	8.5	0.09	0.35	17.39	0.46	0.08	0.08	2.41		TEA034033_CsSCPL21-IA	0	0	0	0	0		0	0	0	0		0	0	0	0	0	0	0		0.19	0	0	0	0.17	0.24	0.12	0.05	0	0.08	0.1	0.05	0	0		0.0519652	0	0	0.0374745
TEA034031_CsSCPL22-IA	0.64	NA	NA	0.34	NA	NA	NA	0.06		TEA034031_CsSCPL22-IA	0	0.0295859	0	0	0		0	0	0	0		0	0.11	0	0	0.25	0	0		6.47	11.01	8.7	5.89	11.56	12.01	9.58	4.56	7.85	8.68	8.41	12.95	10.98	7.47		0.956483	0.0507684	0.0325091	0.737397
TEA034032_CsSCPL23-IA	120.94	0.91	0.08	98.58	0.66	0.36	1.44	13.75		TEA034032_CsSCPL23-IA	0.133436	0.21789	0.143505	0.137448	1.62623		1.83936	0.539866	0.184407	0.0834041		2.98	2.68	1.35	0.96	3.88	4.2	2.06		146.28	94.42	79.85	134.14	127.6	184.12	255.41	188.73	99.15	112.08	235.46	189.4	234.2	230.95		39.036	28.5686	51.0946	38.7078
TEA034056_CsSCPL24-IA	53.31	54.47	109.76	32.19	133.74	88.99	86.61	113.21		TEA034056_CsSCPL24-IA	0.0758983	0.0456401	0.0499769	0.0258192	0.0228318		0.178997	0.0394373	0.0897516	0.121999		62.59	67.87	65.9	54.41	65.38	66.97	57.77		21.8	23.59	19.97	20.09	26.56	26	33.35	24.7	26.57	21.1	24.11	28.08	21.44	27.43		0.208629	0.0144348	0.0170961	0.278312
TEA034027_CsSCPL25-IA	1.97	NA	NA	1.47	NA	NA	NA	0.08		TEA034027_CsSCPL25-IA	0	0	0	0	0		0	0	0	0		0	0	0	0	0	0	0		0	0	0	0	0	0.08	0	0	0	0	0	0	0	0		0.278998	0	0	0.166095
TEA034037_CsSCPL26-IA	0.13	NA	NA	0.09	NA	NA	NA	NA		TEA034037_CsSCPL26-IA	0	0	0	0	0		0	0	0	0		0	0	0	0	0	0	0		0	0	0	0	0	0	0	0	0	0.05	0	0	0	0		0	0	0	0
TEA034038_CsSCPL27-IA	1.69	NA	NA	1.36	NA	NA	NA	0.1		TEA034038_CsSCPL27-IA	0	0	0	0	0		0.0586555	0	0	0		0	0	0	0	0	0	0		7.2	9.34	5.97	4.35	11.47	9.64	9.68	5.73	8.45	6.75	7.74	12.94	10.02	7.65		2.35573	0.399947	0.762459	1.20038
TEA002670_CsSCPL28-IB	31.85	75.48	63.17	53.66	98.48	46.35	29.61	46.51		TEA002670_CsSCPL28-IB	58.0983	64.3672	60.6594	52.9057	39.4308		36.1934	28.762	38.7377	41.3468		23.44	24.99	23.58	18.6	29.77	31.23	24.36		25.95	33.27	40.36	37.45	41.03	27.26	38.31	23.37	27.9	27.26	28.62	37.17	28.84	39.09		34.0754	38.4889	48.3818	59.2162
TEA000768_CsSCPL1-II	6.55	0.24	9.77	11.5	4.93	0.79	3.13	7.2
TEA000773_CsSCPL2-II	27.91	0.6	21.4	33.51	13.36	4.2	8.62	10.9
TEA001323_CsSCPL3-II	5.19	0.11	0.1	3.43	0.03	0	0.91	1.31
TEA002755_CsSCPL4-II	0.24	0.03	0.43	0.2	0.03	0.06	0.32	0.41
TEA003786_CsSCPL5-II	NA	NA	0.03	0.03	NA	NA	4.95	NA
TEA003790_CsSCPL6-II	1.64	1.46	1.13	8.69	9.1	2.58	8.23	0.42
TEA003791_CsSCPL7-II	1.57	87.45	2.03	2.43	0.37	0.12	5.85	3.27
TEA005705_CsSCPL8-II	0.09	4.92	0.07	0.23	0.31	2.29	0.44	0.13
TEA007918_CsSCPL9-II	81.94	4.66	5.73	46.83	17.97	4.39	5.83	293.35
TEA009646_CsSCPL10-II	22.78	28.56	1.23	54.3	20.5	145.29	10.1	10.84
TEA011457_CsSCPL11-II	0.18	2.34	NA	0.13	NA	NA	0.06	0.32
TEA013334_CsSCPL12-II	22.29	46.3	12.79	25.75	7.25	0.64	19.34	47.09
TEA014649_CsSCPL13-II	2.66	0.03	0.03	0.86	NA	NA	2.36	0.41
TEA018021_CsSCPL14-II	25.91	48.78	1.79	23	3.66	0.97	17.87	10.82
TEA019947_CsSCPL15-II	79.54	1.03	1.24	16.19	1.64	NA	1.09	26.4
TEA024180_CsSCPL16-II	17.21	0.07	0.18	19.62	4.63	0.28	4.02	11.35
TEA029303_CsSCPL17-II	3.53	2.82	0.06	2.6	0.43	0.29	3.13	0.45
TEA015220_CsSCPL1-III	91.02	36.8	48.92	99.3	90.99	80.64	127.21	43.69
TEA021977_CsSCPL2-III	0.29	51.15	0.08	2.79	0.42	0.03	1.62	0.05
[truncated: 4 more columns]

## Sheet: Dataset S4
List of primers of CsSCPL genes used for qRT-PCR validation.
Gene Name	Farward Primer	Reverse Primer
SCPL2-IA	ACCAGCAAACAGACCATTAACAT	TCAGCACCGGATACAGATGG
SCPL5-IA	GCTGGTGTTTCTGCTGGTGCTGT	TCTTTCGGGTTGCCTTCGCTTTC
SCPL11-IA	GTATGGCTTTGGCATGGTGA	GTTCATCAAACCATTCGCGC
SCPL13-IA	GATGGCTTTGTGGTGGATTTTGA	CGGATCTTCCTGCGGGTTG
SCPL14-IA	CAACAGCCTGAGCTATACCCA	GGCAGGCTCGGGCGGTTC

## Sheet: Dataset S5
Identity and similarities at amino-acid level among tea and different characterized SCPLs.
	CsSCPL2-I	CsSCPL5-I	CsSCPL11-I	CsSCPL13-I	CsSCPL14-I	AtSAT	AtSST	DkSCPL	VvSCPL18	FvSCPL18	CsSCPL17
CsSCPL2-I		40.4	37.97	39.65	32.93	37.78	36.55	40.16	42.11	38.91	44.06
CsSCPL5-I	55.64		49.39	49.2	38.35	39.01	39.01	48.8	55.05	63.58	44.83
CsSCPL11-I	52.29	62.65		58.2	44.99	36.34	35.52	57.55	56.82	49.59	41.46
CsSCPL13-I	53.58	64	65.8		75.75	40.44	39.04	54.78	55.11	48.3	44.27
CsSCPL14-I	45.91	53.2	51.74	77.35		31.13	29.69	44.18	44.1	37.65	33.94
AtSAT	51.33	52.57	50.1	51.59	40.62		77.12	38.66	40.46	35.98	41.15
AtSST	51.54	52.16	50.31	51.59	40	84.44		36.64	40.04	36.82	39.87
DkSCPL	54.72	65.66	68.01	66.28	54.22	49.8	49.39		56.82	47.87	43.35
VvSCPL18	56.28	68.66	67.56	68.14	55.9	52.2	53.25	70.88		51.57	47.3
FvSCPL18	53.63	75.72	61.93	61.48	51.03	51.26	51.88	64.5	66.81		42.15
CsSCPL17	57.38	60.24	53.25	57.11	46.54	54.58	53.94	57.86	61.2	57.64
